# Supplementary material for: Decarboxylation mechanisms of C4 photosynthesis in Saccharum spp.: increased PEPCK activity under water-limiting conditions
Source: PubMed Central journal article supplement (PMC6469216; doi:10.1186/s12870-019-1745-7), 2019-04-16

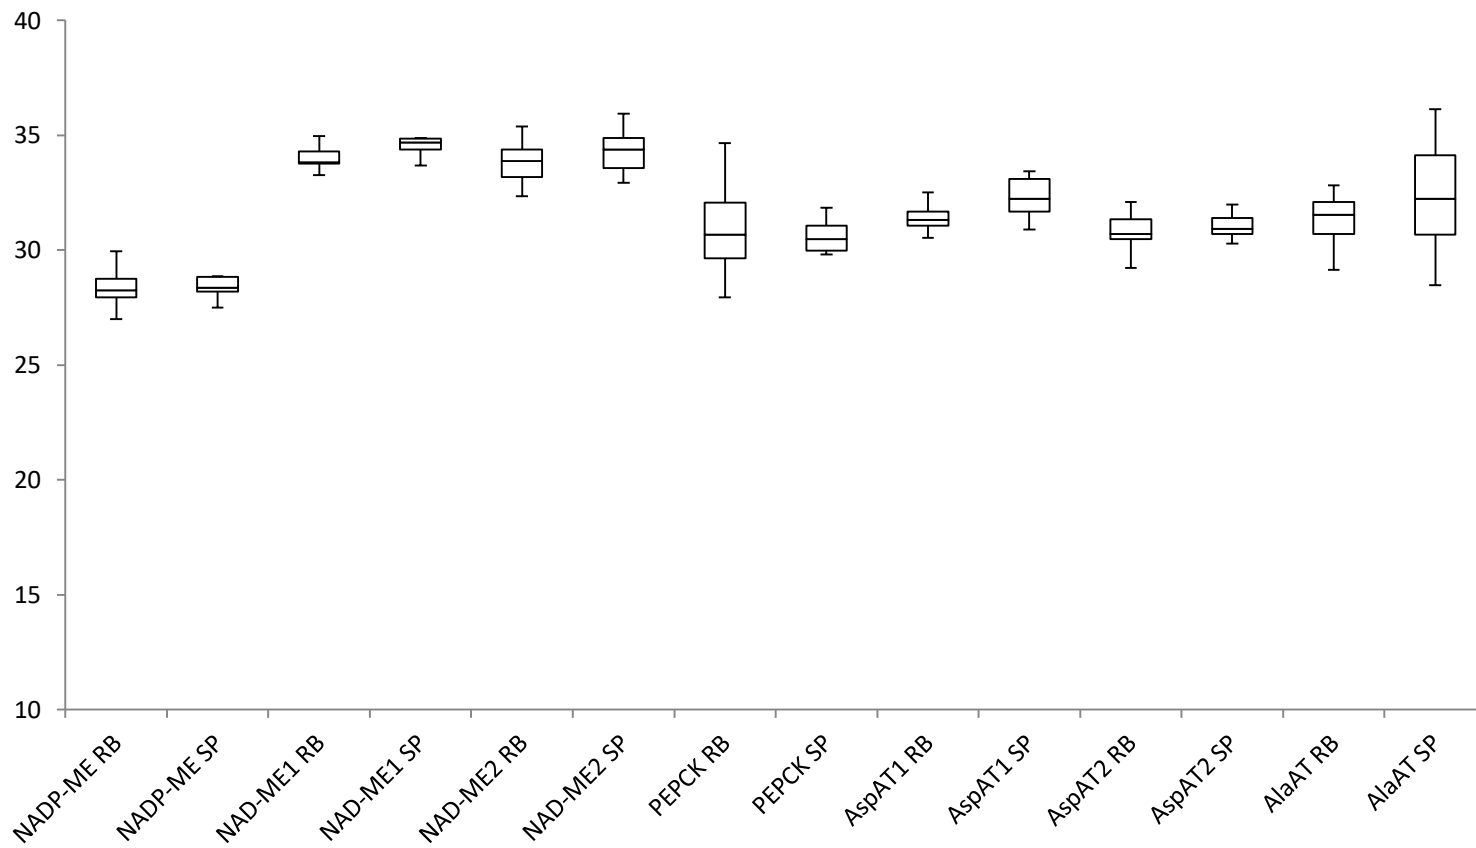

Supplement: 12870_2019_1745_MOESM2_ESM.pdf [file 12870_2019_1745_MOESM2_ESM.pdf]
